# Supplementary material for: Pancreatic cancer induces muscle wasting by promoting the release of pancreatic adenocarcinoma upregulated factor
Source: PubMed Central journal article supplement (PMC8080719; doi:10.1038/s12276-021-00582-2), 2021-03-17
Supplement: 12276_2021_582_MOESM1_ESM.pdf [file 12276_2021_582_MOESM1_ESM.pdf]

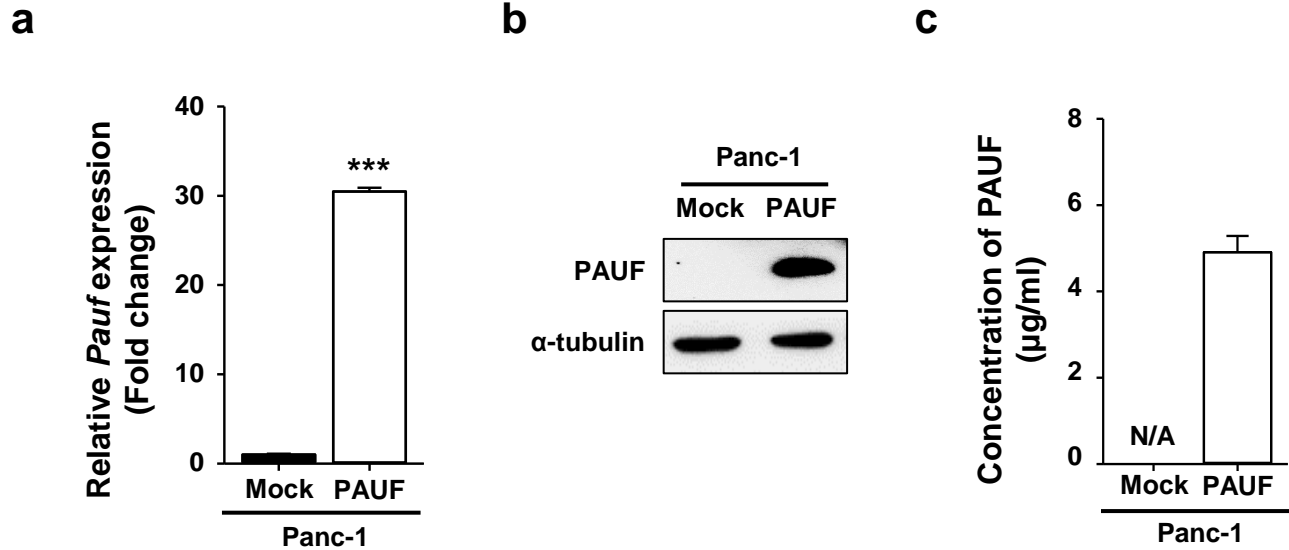

**Supplementary Figure 1. Expression level of PAUF mRNA and protein in Panc-1/Mock and Panc-1/PAUF cell line.**

**a** Quantification by RT-qPCR of *Pauf* mRNA expression levels in Panc-1/Mock and Panc-1/PAUF cell lines. mRNA expression levels were normalized with *Gapdh* mRNA. **b** Western blot analysis and **c** ELISA assay of PAUF from cell cultured medium in Panc-1/Mock and Panc-1/PAUF cell lines. The data represent the mean  $\pm$  SD. \* $p < 0.05$ , \*\* $p < 0.01$ , and \*\*\* $p < 0.001$  vs. Panc-1/Mock cell line. N/A, not available.

**a**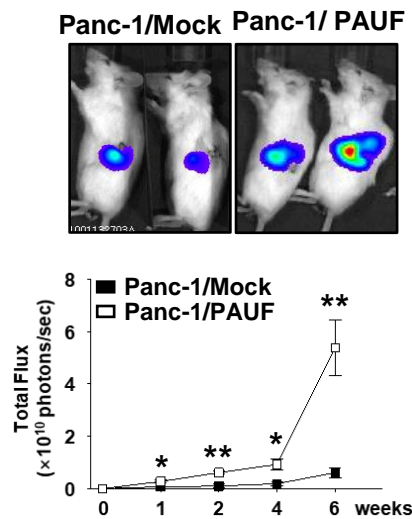**b**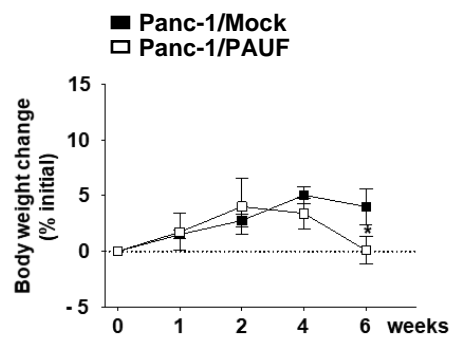**c**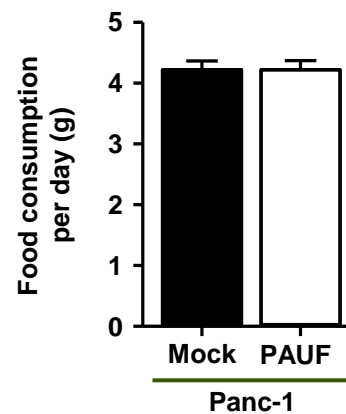**d**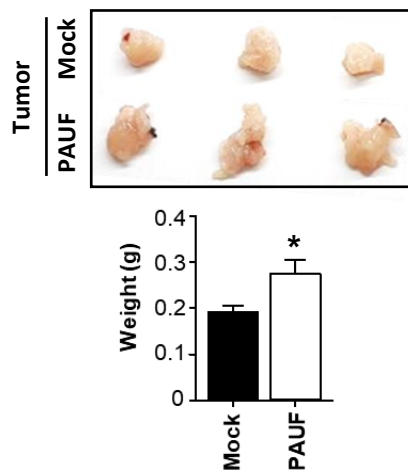**e**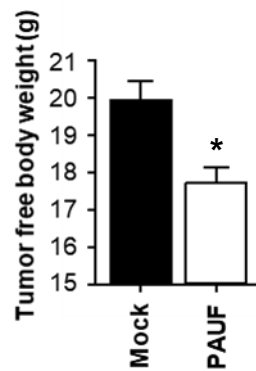**f**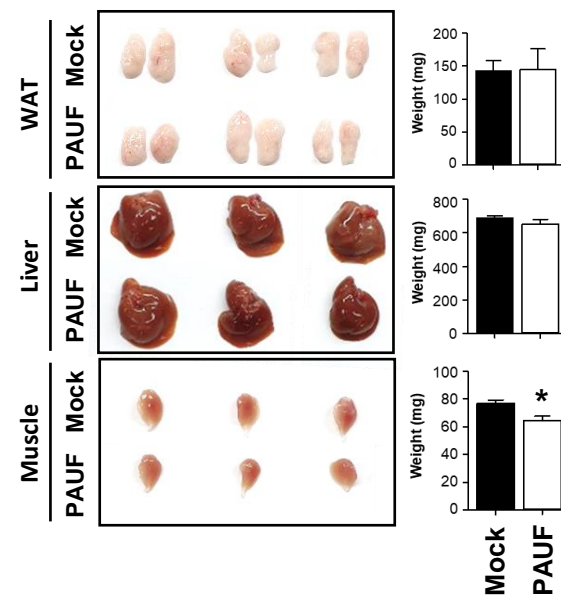

## **Supplementary Figure 2. Association between cachexia and pancreatic cancer-derived PAUF.**

Panc-1/Mock or Panc-1/PAUF cells were orthotopically injected into NSG mice. **a** Bioluminescent imaging by luciferase in Panc-1/Mock or Panc-1/PAUF cancer model and photon values of tumor mass were displayed in the graph. **b** Time-dependent changes were expressed as percent modulation of initial body weight. **c** Food consumption per day. **d** Representative tumor image and tumor weight after Panc-1/Mock cells or Panc-1/PAUF cells at 6 weeks post-injection. **e** Tumor-free body weight. **f** Representative images of white adipose tissues (WAT), liver, and tibialis anterior (TA) muscles are shown in Panc-1/Mock or Panc-1/PAUF tumor-bearing mice. Weight of WAT, liver, and TA muscle. The data represent the mean  $\pm$  SD. \* $p < 0.05$  and \*\* $p < 0.01$  vs. Panc-1/Mock-injected mice.

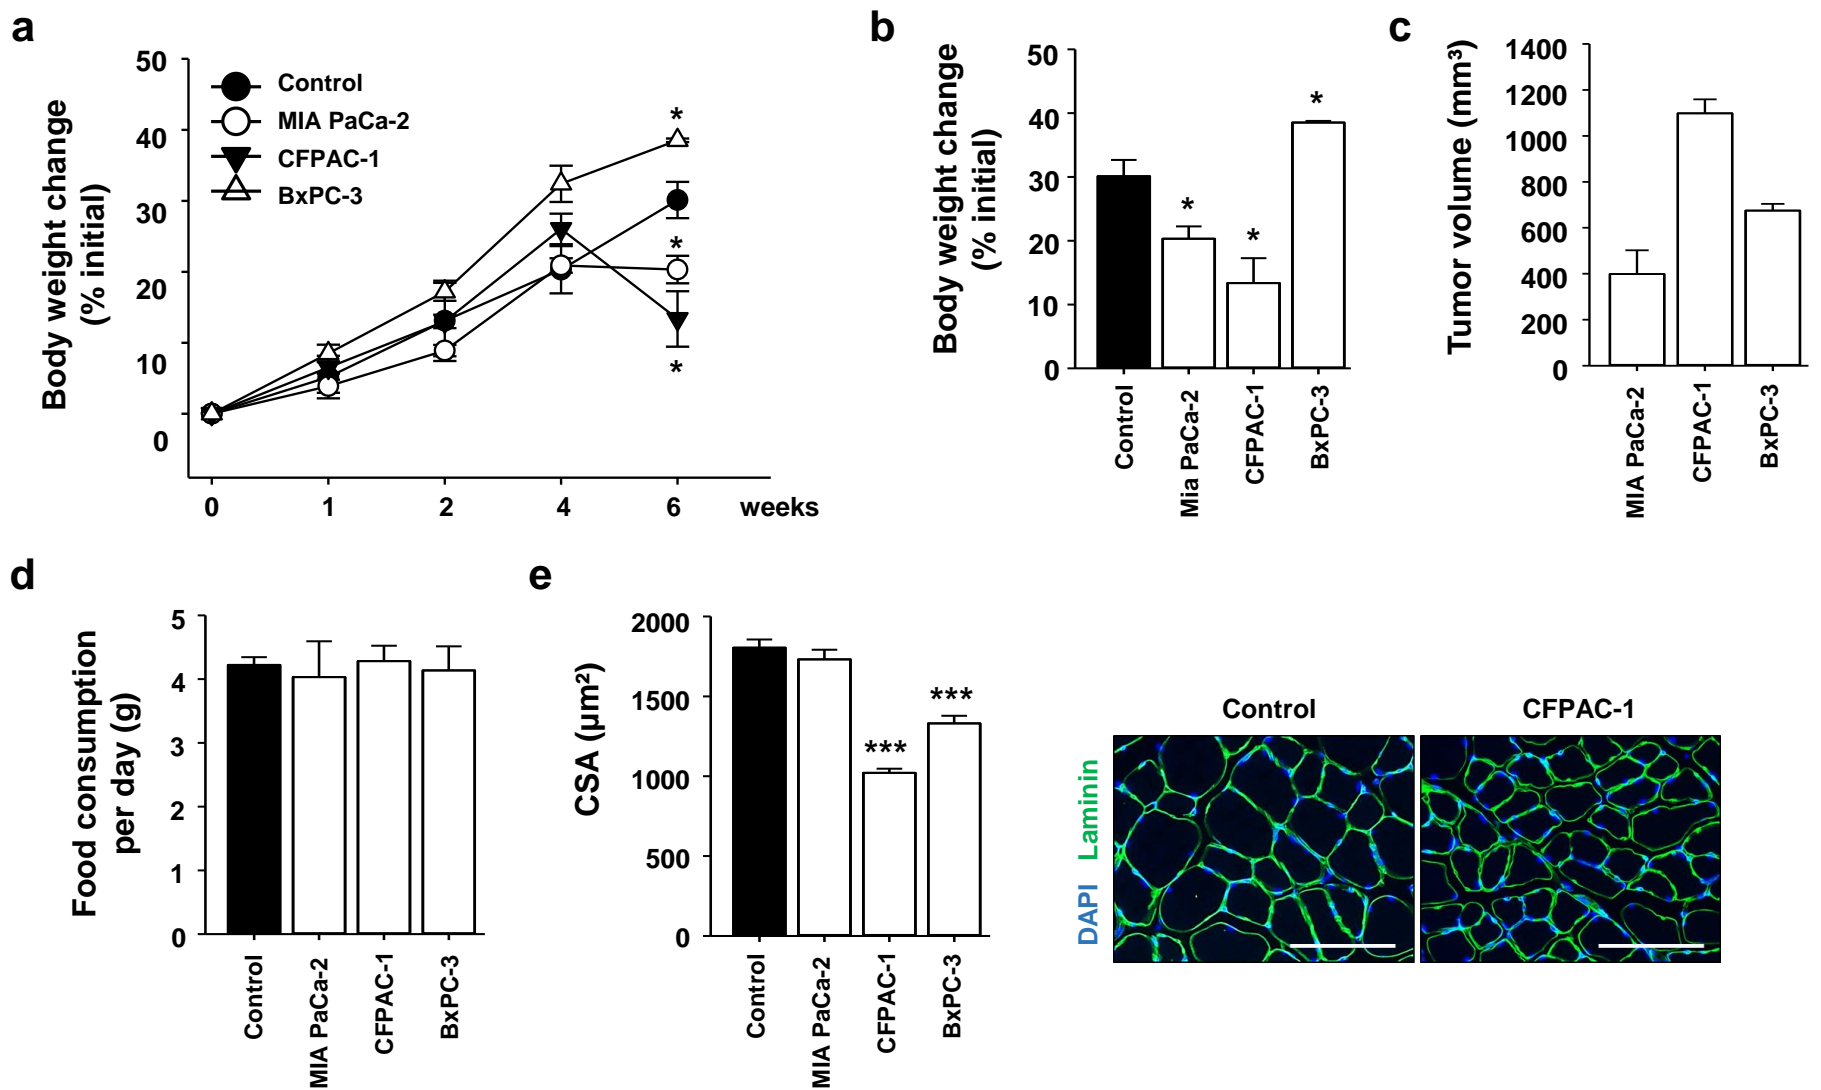

**Supplementary Figure 3. PAUF-expression human pancreatic cancer cell lines induce body weight loss and muscle atrophy.**

**a** Time-dependent changes expressed as percent modulation of initial body weight in mice injected subcutaneously with human pancreatic cancer cell lines ; MIA PaCa-2, CFPAC-1, and BxPC-3 or PBS (control). **b** Final body weight change percent compared to initial body weight and **c** tumor volume at 6 weeks post-injection. **d** Food consumption per day. **e** The graph shows the mean CSA of muscle myofibers. The data represent the mean  $\pm$  SD. \* $p < 0.05$ , \*\* $p < 0.01$ , and \*\*\* $p < 0.001$  vs. PBS.

**a**

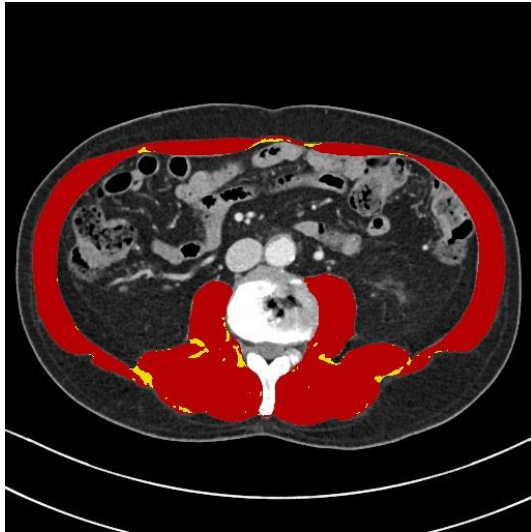

**b**

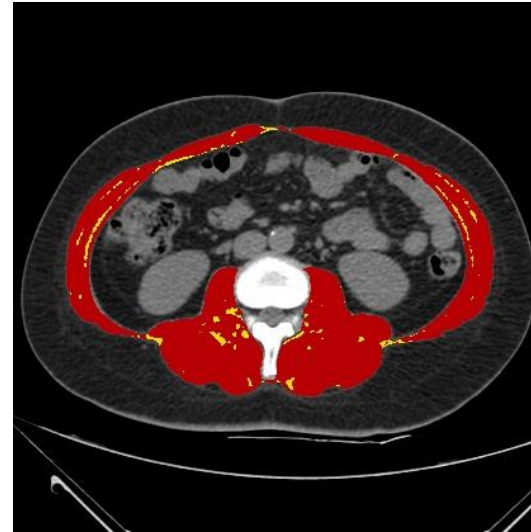

**Supplementary Figure 4. Representative images of muscle and fat measurement in CT of patients.**

The SMA (red colored area) and IMA (yellow colored area) at abdominal CT scan in cancer patients were segmented. **a** In 71-year old patient, CT showed large SMA and low IMA, and the plasma PAUF level was 7.33 ng/ml. **b** In 49-year old patient, CT showed small SMA and large IMA, and the plasma PAUF level was 11.63 ng/ml. (SMA; skeletal muscle area , IMA; intermuscular fat area ).

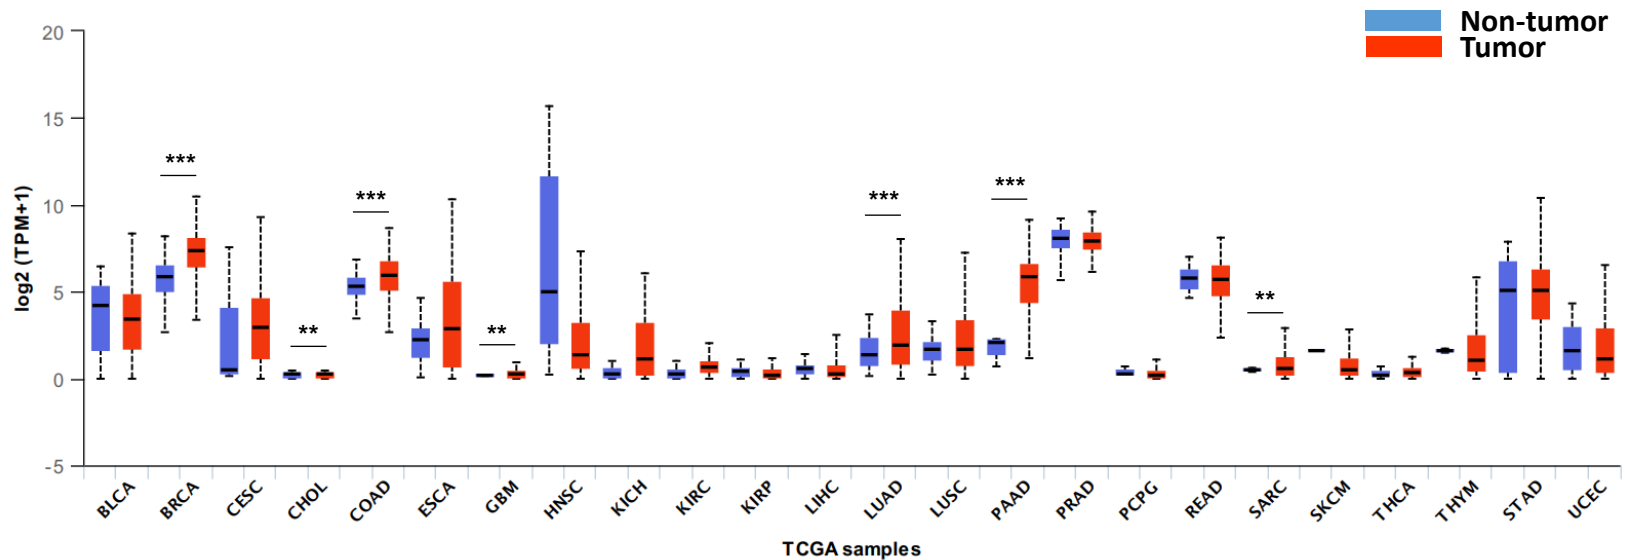

### Supplementary Figure 5. Expression of PAUF across TCGA cancers (with tumor and normal samples)

**BLCA:** Bladder urothelial carcinoma; **BRCA:** Breast invasive carcinoma; **CESC:** Cervical squamous cell carcinoma; **CHOL:** Cholangiocarcinoma; **COAD:** Colon adenocarcinoma; **ESCA:** Esophageal carcinoma; **GBM:** Glioblastoma multiform; **HNSC:** Head and neck squamous cell carcinoma; **KICH:** Kidney chromophobe; **KIRC:** Kidney renal clear cell carcinoma; **KIRP:** Kidney renal papillary cell carcinoma; **LIHC:** Liver hepatocellular carcinoma; **LUAD:** Lung adenocarcinoma; **LUSC:** Lung squamous cell carcinoma; **PAAD:** Pancreatic adenocarcinoma; **PCPG:** Pheochromocytoma and paraganglioma; **READ:** Rectal adenocarcinoma; **SARC:** Sarcoma; **SKCM:** Skin cutaneous melanoma; **THCA:** Thyroid carcinoma; **THYM:** Thymoma; **STAD:** Stomach adenocarcinoma; **UCEC:** Uterine corpus endometrial carcinoma

**Supplementary Table 1.** Hematological characteristics of pancreatic cancer patients

| Variable                      | ALL            | Low PAUF<br>(PAUF < 10.2ng/ml) | High PAUF<br>(PAUF ≥ 10.2ng/ml) | p-value          |
|-------------------------------|----------------|--------------------------------|---------------------------------|------------------|
| <b>Hb (g/dL)</b>              | 12.9 (±1.4)    | 12.9 (±1.7)                    | 12.9 (±1.2)                     |                  |
| <b>Hct (%)</b>                | 38.8 (±4.3)    | 38.6 (±5)                      | 39.1 (±3.7)                     |                  |
| <b>Platelet</b>               | 242.1 (±80.8)  | 249.5 (±81.5)                  | 233 (±83.8)                     |                  |
| <b>monocyte (%)</b>           | 7.3 (±1.9)     | 6.6 (±1.6)                     | 8.2 (1.9)                       |                  |
| <b>PT (sec)</b>               | 11.8 (±1.2)    | 11.4 (±0.7)                    | 12.4 (1.5)                      |                  |
| <b>aPTT (sec)</b>             | 27.7 (±3.3)    | 27 (±2.8)                      | 28.6 (±3.9)                     |                  |
| <b>AST (IU/L)</b>             | 46.7 (±75.9)   | 26.4 (±18.4)                   | 71.4 (±109.5)                   | n.s <sup>a</sup> |
| <b>ALT (IU/L)</b>             | 54.9 (101.5)   | 24 (±18.9)                     | 92.7 (±145.2)                   |                  |
| <b>ALP (IU/L)</b>             | 115 (±90.2)    | 101.1 (±41.1)                  | 132 (±129)                      |                  |
| <b>Tbil (mg/dL)</b>           | 0.8 (±0.6)     | 0.7 (±0.5)                     | 1 (±0.7)                        |                  |
| <b>BUN (mg/dL)</b>            | 14.6 (±5.9)    | 14.2 (±6.1)                    | 15.1 (±5.9)                     |                  |
| <b>Creatinine<br/>(mg/dL)</b> | 0.8 (±0.2)     | 0.8 (±0.2)                     | 0.8 (±0.2)                      |                  |
| <b>CA19-9<br/>(U/mL)</b>      | 332.2 (±396.4) | 312.2 (±384)                   | 356.5 (±433.3)                  |                  |

Values are means ± standard deviations.

<sup>a</sup>Mann–Whitney U-test.

Hb; Hemoglobin, Hct; Hematocrit, PT; Prothrombin Time, aPTT; activated Partial Thromboplastin Time, AST; Aspartate Aminotransferase, ALT; alanine aminotransferase, ALP; Alkaline Phosphatase, Tbil; Total Bilirubin, BUN; Blood Urea Nitrogen.
